# Supplementary material for: A porous PDMS pulsewave sensor with haircell structures for water vapor transmission rate and signal-to-noise ratio enhancement
Source: Royal Society of Chemistry journal article supplement (doi:10.1039/d1na00180a), 2021-01-01
Supplement: d1na00180a1.pdf [file d1na00180a1.pdf]

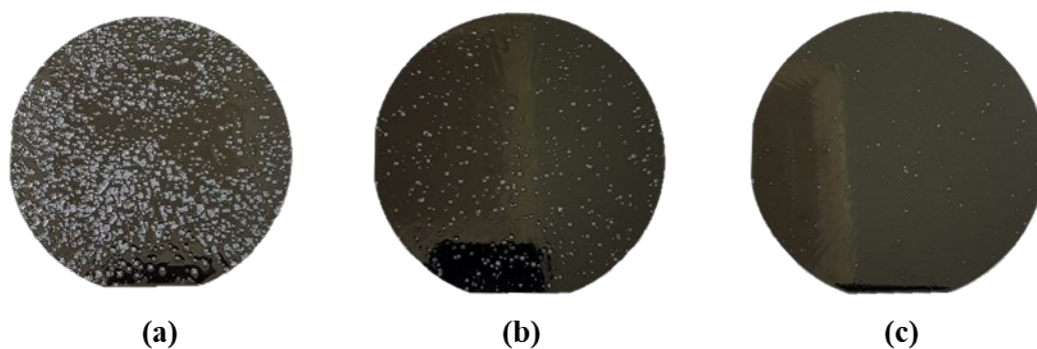

**Figure S1.** The porous PDMS layers, mixed with the citric acid and spin-coated at the different spin coating rpm of (a) 1,000; (b) 2,000; (c) 4,000 on the silicon wafer.

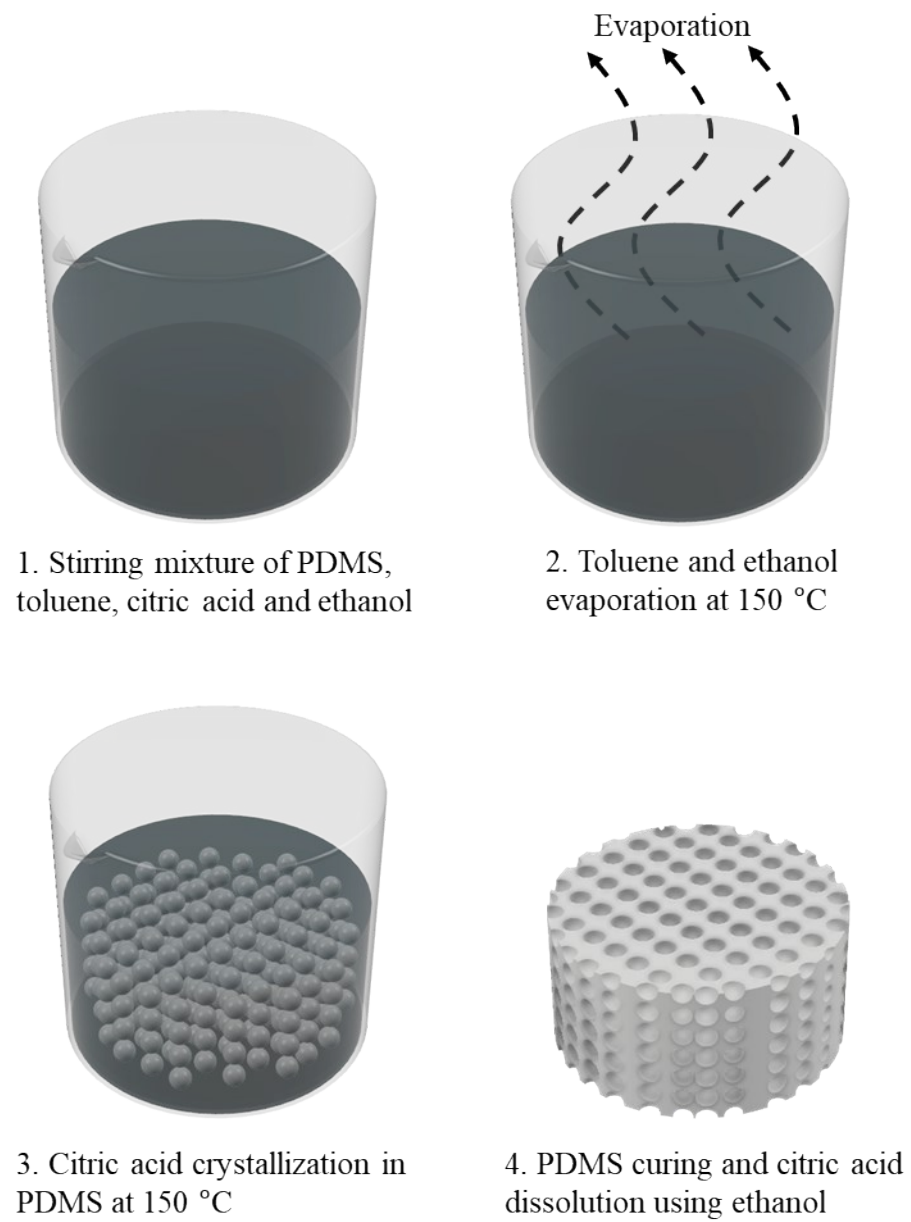

**Figure S2.** Fabrication process of the porous PDMS layers.

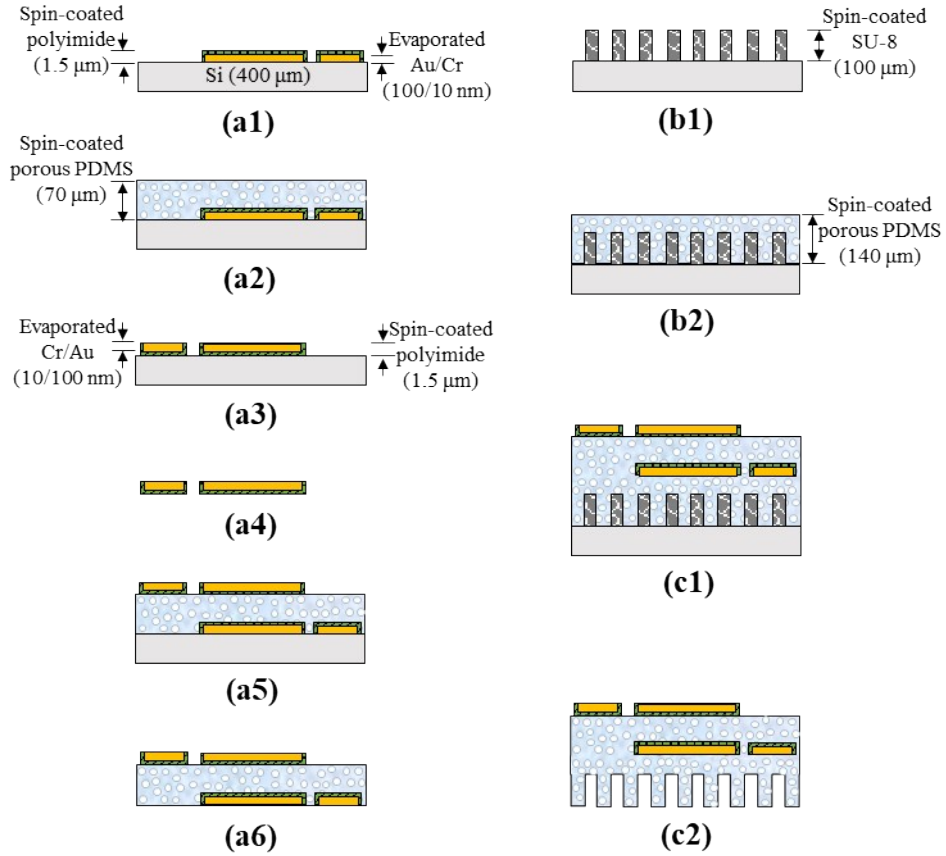

**Figure S3.** Fabrication process of the porous PDMS pulsewave sensor with haircell structures: (a1-a6) Fabrication process for the pulsewave sensor; (b1-b2) Polymer molding process for the haircell structures; (c1-c2) Assembly of the pulsewave sensor (a6) and the haircell structures (b2), followed by SU8 mold removal.

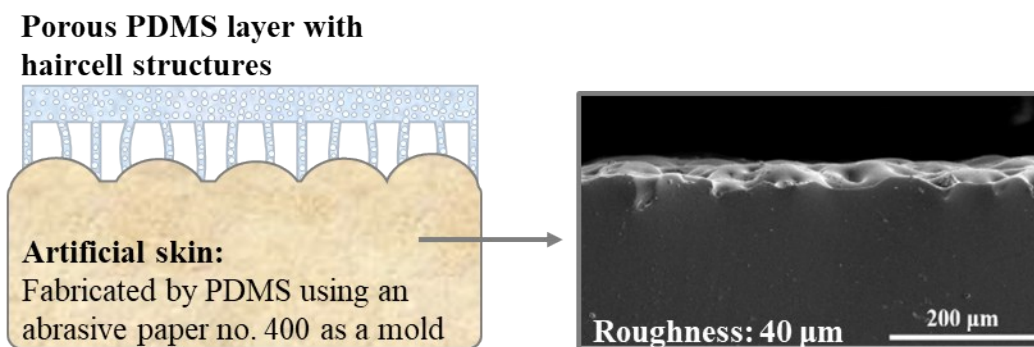

**Figure S4.** Experimental set-up for the contact area measurement, where the porous PDMS layer with the haircell structures is touched on the artificial skin, whose surfaces are shown in the right-side optical microscope image.

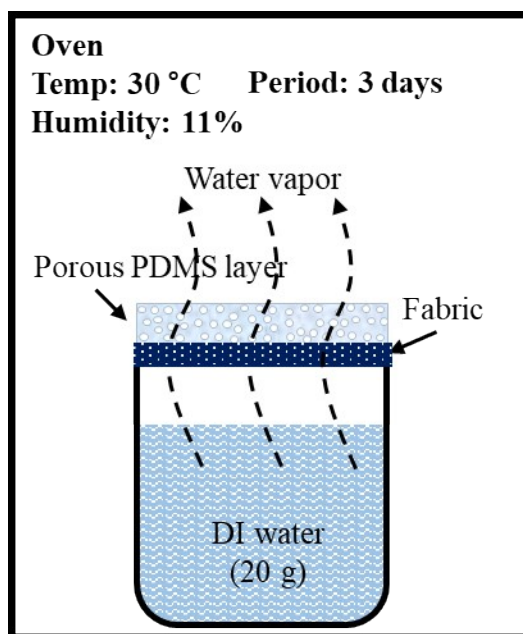

**Figure S5.** Experimental set-up for the water vapor transmission rate measurement for the porous PDMS layers.

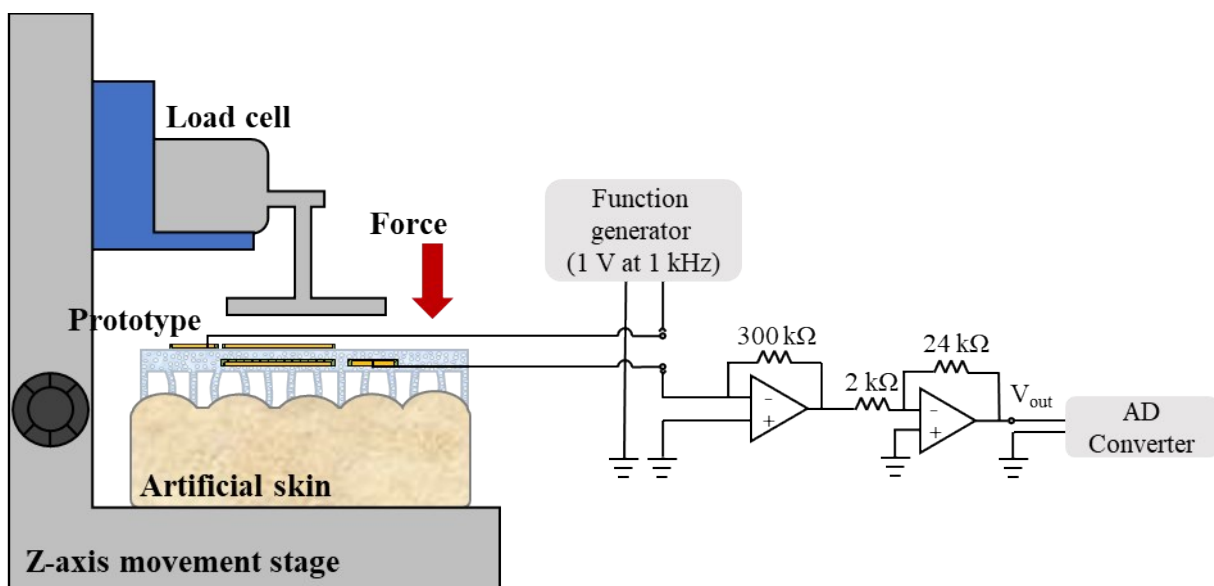

**Figure S6.** Experimental set-up for the prototype characterization, described in Results and Discussion.

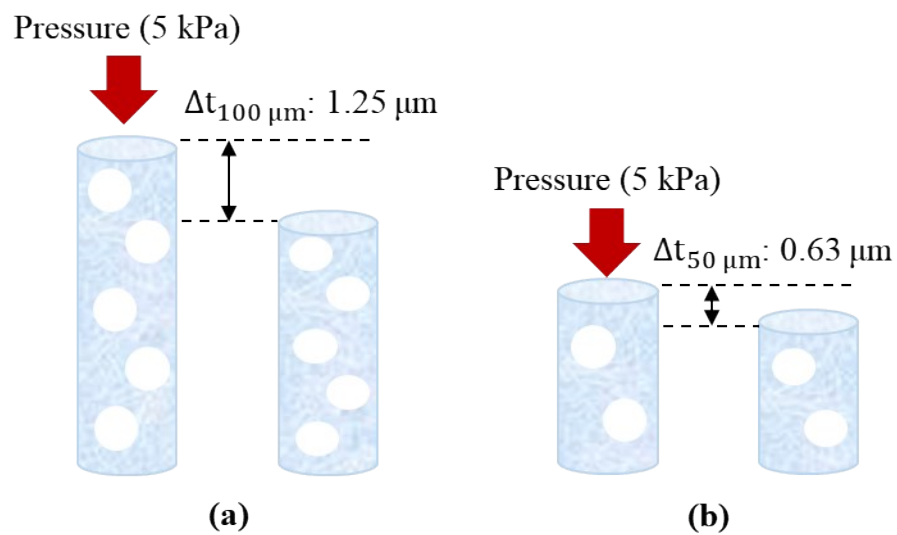

**Figure S7.** Deformation of the porous PDMS haircells at the pressure of 5 kPa, depending on the haircell heights of (a) 100  $\mu\text{m}$  and (b) 50  $\mu\text{m}$ , respectively.

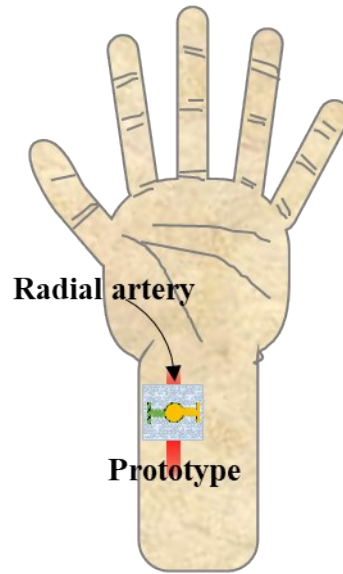

**Figure S8.** Experimental set-up for the radial artery pulse detection using the prototype attached to the wrist, as described in Results and Discussion.



**Table S1.** The pore size and porosity, measured from the porous PDMS layers, fabricated with the different weight ratios of the citric acid powders to PDMS.

| Weight ratio<br>[Citric acid : PDMS] | Pore size         |      | Porosity      |      |
|--------------------------------------|-------------------|------|---------------|------|
|                                      | [ $\mu\text{m}$ ] | CV*  | [%]           | CV   |
| 0.5 : 1                              | $21.08 \pm 4.29$  | 0.20 | $45 \pm 1.76$ | 0.04 |
| 1 : 1                                | $25.90 \pm 5.61$  | 0.22 | $56 \pm 3.23$ | 0.06 |
| 1.5 : 1                              | $24.40 \pm 10.30$ | 0.42 | $55 \pm 2.64$ | 0.05 |
| 2 : 1                                | $16.88 \pm 13.35$ | 0.79 | $59 \pm 4.61$ | 0.08 |

\*CV (Coefficient of variation) = Standard deviation/Average

**Table S2.** Skin attachment test results using the conventional PDMS layer and the porous PDMS layer for 7 days.

|                                                                         | Conventional PDMS layer                                                                                      | Porous PDMS layer                                                                                               |
|-------------------------------------------------------------------------|--------------------------------------------------------------------------------------------------------------|-----------------------------------------------------------------------------------------------------------------|
| Specimen dimension<br>(w × l × t)                                       | 19.45 × 19.53 × 0.65 mm                                                                                      | 19.37 × 19.38 × 0.59 mm                                                                                         |
| Skin redness level*<br>(R <sub>surround</sub> , R <sub>specimen</sub> ) | <br>(21.7 ± 4.0, 8.2 ± 2.8) | <br>(21.8 ± 4.1, 20.0 ± 3.5) |
| Skin redness index<br>(R <sub>surround</sub> / R <sub>specimen</sub> )  | 2.7                                                                                                          | 1.1                                                                                                             |
| Itchiness level<br>survey from subject<br>(0~10)                        | 5                                                                                                            | 0                                                                                                               |
| Medical diagnosis<br>from dermatologist                                 | Irritant contact dermatitis                                                                                  | N/A                                                                                                             |

\* R<sub>specimen</sub> and R<sub>surround</sub> are the skin redness level where specimen was attached or not, respectively. Skin redness level was estimated by hue, saturation, lightness (HSL) color code that meant 0 was red and 25 was yellow.
